# Supplementary material for: Treatment with Helicobacter pylori-derived VacA attenuates allergic airway disease
Source: PubMed Central journal article supplement (PMC9902502; doi:10.3389/fimmu.2023.1092801), 2023-01-24
Supplement: DataSheet_1.pdf [file DataSheet_1.pdf]

## *Supplementary Material*

| Panel                 | murine Treg Analysis      |             |             |                       |                |
|-----------------------|---------------------------|-------------|-------------|-----------------------|----------------|
| Fluochrome            | Specificity               | Clone       | Reactivity  | Antibody Host Species | Manufacturer   |
| PerCP-Cy™5.5          | CD3                       | 145-2C11    | mouse       | rat                   | Biologend      |
| PE/Cyanine7           | CD4                       | 53-6.7      | mouse       | rat                   | Biologend      |
| Pe                    | CD25                      | PC61        | mouse       | rat                   | BD Pharmingens |
| Brilliant Violet 650™ | CD25                      | PC61        | mouse       | rat                   | Biologend      |
| APC                   | FoxP3                     | FJK-16s     | mouse       | rat                   | Biologend      |
| Panel                 | murine DC/B cell Analysis |             |             |                       |                |
| Fluochrome            | Specificity               | Clone       | Reactivity  | Antibody Host Species | Manufacturer   |
| FITC                  | MHCII                     | M5/114.15.2 | mouse       | rat                   | Biologend      |
| PE/Dazzle™ 594        | CD19                      | 6D5         | mouse       | rat                   | Biologend      |
| PE/Cyanine7           | CD11c                     | N418        | mouse       | hamster               | Biologend      |
| APC/Cyanine7          | CD3                       | 145-2C11    | mouse       | hamster               | Biologend      |
| Alexa Fluor® 700      | CD45                      | 30F11       | mouse       | rat                   | Biologend      |
| Brilliant Violet 421™ | Ly6c                      | HK1.4.      | mouse       | rat                   | Biologend      |
| Brilliant Violet 785™ | B220                      | RA3-6B2     | mouse/human | rat                   | Biologend      |

**Supplementary Table 1. Antibody List murine ex vivo Analysis**

| Panel                 | murine DC activation |             |            |                       |              |
|-----------------------|----------------------|-------------|------------|-----------------------|--------------|
| Fluochrome            | Specificity          | Clone       | Reactivity | Antibody Host Species | Manufacturer |
| FITC                  | MHCII                | M5/114.15.2 | mouse      | rat                   | Biologend    |
| PE                    | CD86                 | GL1         | mouse      | rat                   | Biologend    |
| PerCP-Cy™5.5          | CD80                 | 16-10A1     | mouse      | hamster               | Biologend    |
| PE/Cyanine7           | CD11c                | N418        | mouse      | hamster               | Biologend    |
| Pacific Blue          | CD40                 | 3/23        | mouse      | rat                   | Biologend    |
| NUV450                | Zombie UV            |             |            |                       | Biologend    |
| Panel                 | human DC activation  |             |            |                       |              |
| Fluochrome            | Specificity          | Clone       | Reactivity | Antibody Host Species | Manufacturer |
| FITC                  | PD-L1                | MIH3        | human      | mouse                 | Biologend    |
| PE/Dazzle™ 594        | PD1                  | EH12.2.H1   | human      | mouse                 | Biologend    |
| PE/Cyanine7           | ILT3                 | ZM4.1       | human      | mouse                 | Biologend    |
| Brilliant Violet 421™ | HLA-DR               | L243        | human      | mouse                 | Biologend    |
| Brilliant Violet 510™ | CD80                 | 2D10        | human      | mouse                 | Biologend    |
| Brilliant Violet 605™ | CD40                 | 5c3         | human      | mouse                 | Biologend    |
| Brilliant Violet 650™ | CD11c                | 3.9         | human      | mouse                 | Biologend    |
| Brilliant Violet 785™ | CD86                 | IT2.2       | human      | mouse                 | Biologend    |
| NUV450                | Zombie UV            |             |            |                       | Biologend    |
| Panel                 | human Treg Analysis  |             |            |                       |              |
| Fluochrome            | Specificity          | Clone       | Reactivity | Antibody Host Species | Manufacturer |
| PercP-Cy5.5           | CD4                  | RPAT4       | human      | mouse                 | Biologend    |
| APC                   | CD127                | AO19D5      | human      | mouse                 | Biologend    |
| AF700                 | CD3                  | UCHT1       | human      | mouse                 | Biologend    |
| Brilliant Violet 421™ | CD25                 | HIB 19      | human      | mouse                 | Biologend    |
| NUV450                | Zombie UV            |             |            |                       | Biologend    |

Supplementary Table 2. Antibody List murine/human in vitro Analysis

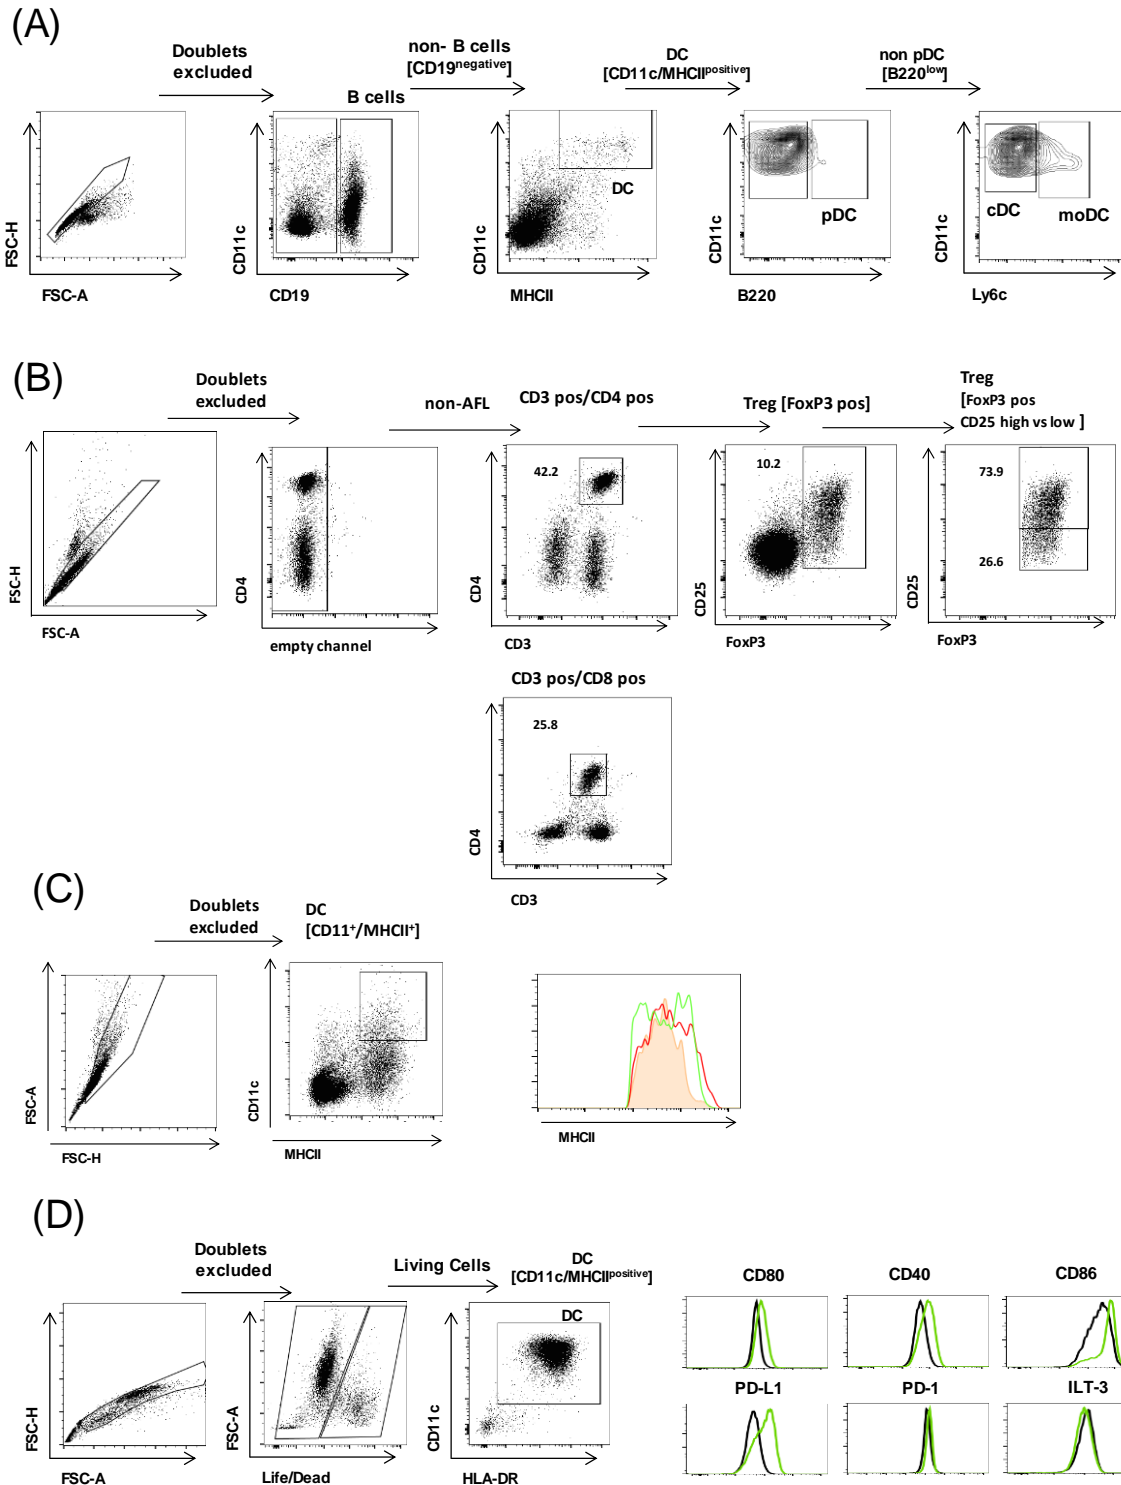

**Supplementary Figure 1: Flow cytometry gating strategies B cells/DC Subtypes, Tregs and DC MHCII expression *ex vivo*/DC activation *in vitro*.** A) The dot plots presented show the gating strategy used to analyze B cells and DC *ex vivo*. Following exclusion of doublets via FSC-A vs. FSC-H B cells were characterized as CD19 positive cells. Within the group of CD19 negative cells DC were analyzed as CD11c/MHCII positive cells. To further distinguish subpopulation expression

## Supplementary Material

of B220 was analyzed and positive cells were characterized as pDC. Further, Ly6c expression was analyzed on B220 negative cells. Ly6c negative cells were identified as cDC and positive cells as moDC. B) The gating strategy shows the in vitro analysis of regulatory T cells ex vivo. First, debris and doublets were excluded based on size and shifting properties seen by analysis of FSC-Height vs. FSC-Area. Autofluorescent cells, positive cells in an empty channel were excluded. Based on the expression of CD8/CD3 cytotoxic T cells were differentiated from CD3/CD4 positive T Helper cells. Tregs were then defined as FoxP3-positive cells within the population of CD3/CD4 positive cells. Treg subpopulations were further subdivided in CD25<sup>+</sup> cell and CD25<sup>-</sup> cells. C) The gating demonstrates identification of DC and analysis of their MHCII expression in tLN: First, debris and doublets were excluded based on size and shifting properties seen by analysis of FSC-Height vs. FSC-Area. DC were identified by the expression of CD11c and MHCII. Within the population mean fluorescence intensity of MHCII was analyzed. Histogram shows MHCII expression in HDM/PBS (shaded orange), HDM/HDM (red line) and HDM/HDM VacA animals (green line). D) The gating strategy shows the in vitro analysis of DC activation using human DC as an example. Following exclusion of doublets living cells were identified based on the reduced expression of a life/dead marker. Within the living cells DC were characterized as CD11c/HLA-DR positive cells. Within the DC population surface expression of the markers shown in the histograms was analyzed. Histograms show the expression of the indicated markers on naïve DC (black line) and naïve DC treated with VacA (green line).

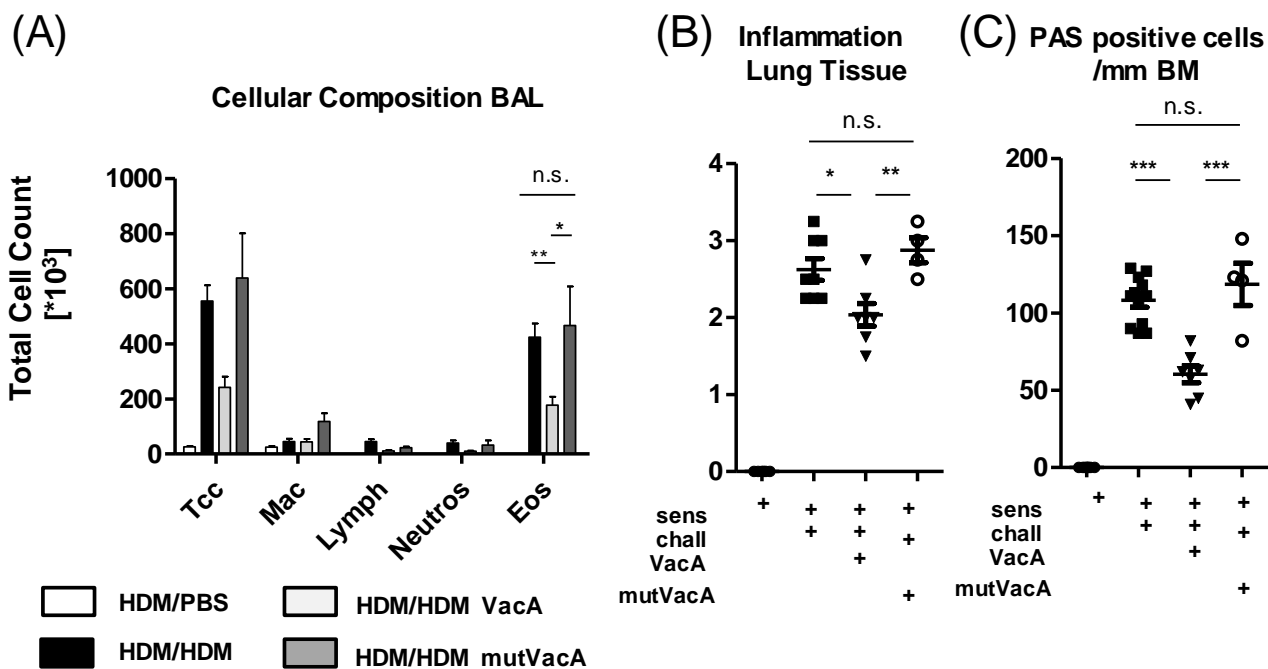

**Supplementary Figure 2: Effect of a VacA mutant on asthma hallmarks in an acute murine asthma model. A) Cellular composition of bronchoalveolar lavage (BAL) fluid:** The positive control (HDM/HDM, black bars) showed increased total cell count (Tcc), macrophages (Mac), lymphocytes (Lymph), neutrophils (Neutros) and eosinophils (Eos) compared with the negative Control (HDM/PBS, white bars). Eosinophil numbers were reduced in animals treated with VacA (HDM/HDM VacA, light gray) and comparable to the positive control in animals treated with the VacA mutant (HDM/HDM mutVacA, dark gray). **B: Inflammation in lung tissue:** Scatter plot shows inflammation score for HDM/PBS, HDM/HDM, HDM/HDM VacA or HDM/HDM mutVacA animals. **C: Mucus-producing cells in lung airways:** Scatter plot shows averaged number of mucus-producing cells/mm basal membrane in HDM/PBS, HDM/HDM and HDM/HDM VacA or HDM/HDM mutVacA animals.

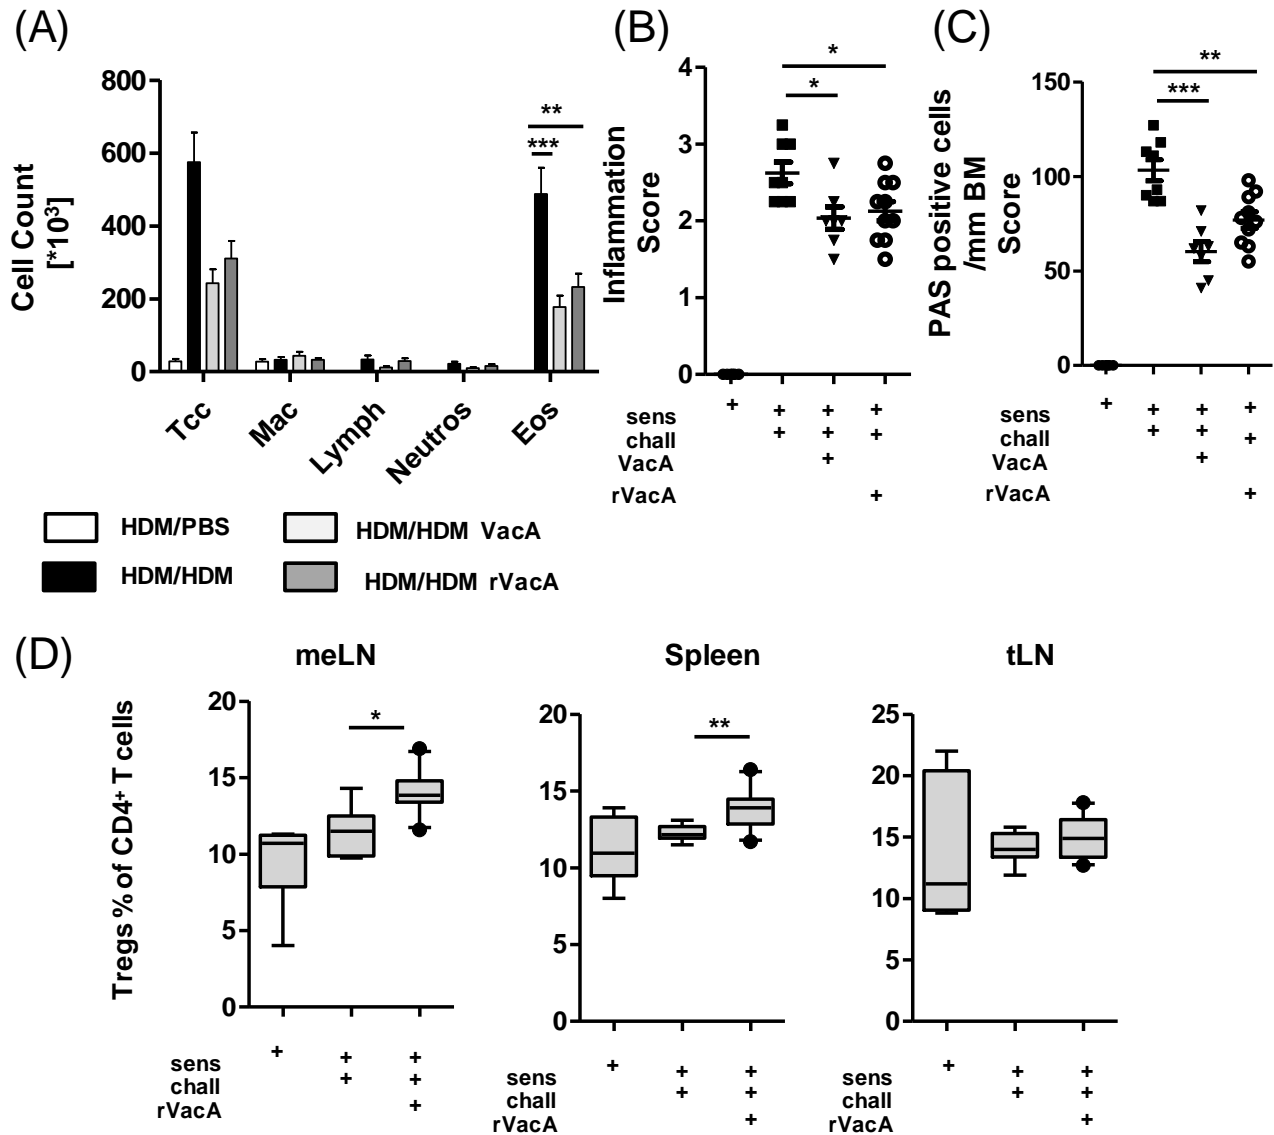

**Supplementary Figure 3: Recombinant produced VacA attenuates allergic airway disease in adult mice.** **A) Cellular composition of bronchoalveolar lavage (BAL) fluid:** The positive control (HDM/HDM, black bars) showed increased total cell count (Tcc), macrophages (Mac), lymphocytes (Lymph), neutrophils (Neutros) and eosinophils (Eos) compared with the negative Control (HDM/PBS, white bars). Numbers eosinophils were reduced detectable in animals treated with VacA (HDM/HDM VacA, light gray) or rVacA (HDM/HDM VacA, dark gray). **B) Inflammation in lung tissue:** Scatter plot shows inflammation scores for HDM/PBS, HDM/HDM, HDM/HDM VacA or HDM/HDM rVacA animals. **C) Mucus-producing cells in lung airways:** Scatter plot shows averaged number of mucus producing cells/mm basal membrane in HDM/PBS, HDM/HDM and HDM/HDM VacA or HDM/HDM rVacA animals. **D) Box plots** (Whiskers 10-90 percentile) show proportion of CD25/FoxP3 positive cells within the CD4/CD3 positive T helper cell population in

mesenteric lymph nodes (meLN), spleen and lung draining lymph nodes (tLN) of negative and positive controls, and rVacA-treated animals. **B-D**: Each point represents one animal, Data are results from two independent experiments, n=6–10 per group; Analysis of variance, \*p<0.05, \*\*p<0.01, \*\*\*p<0.001.

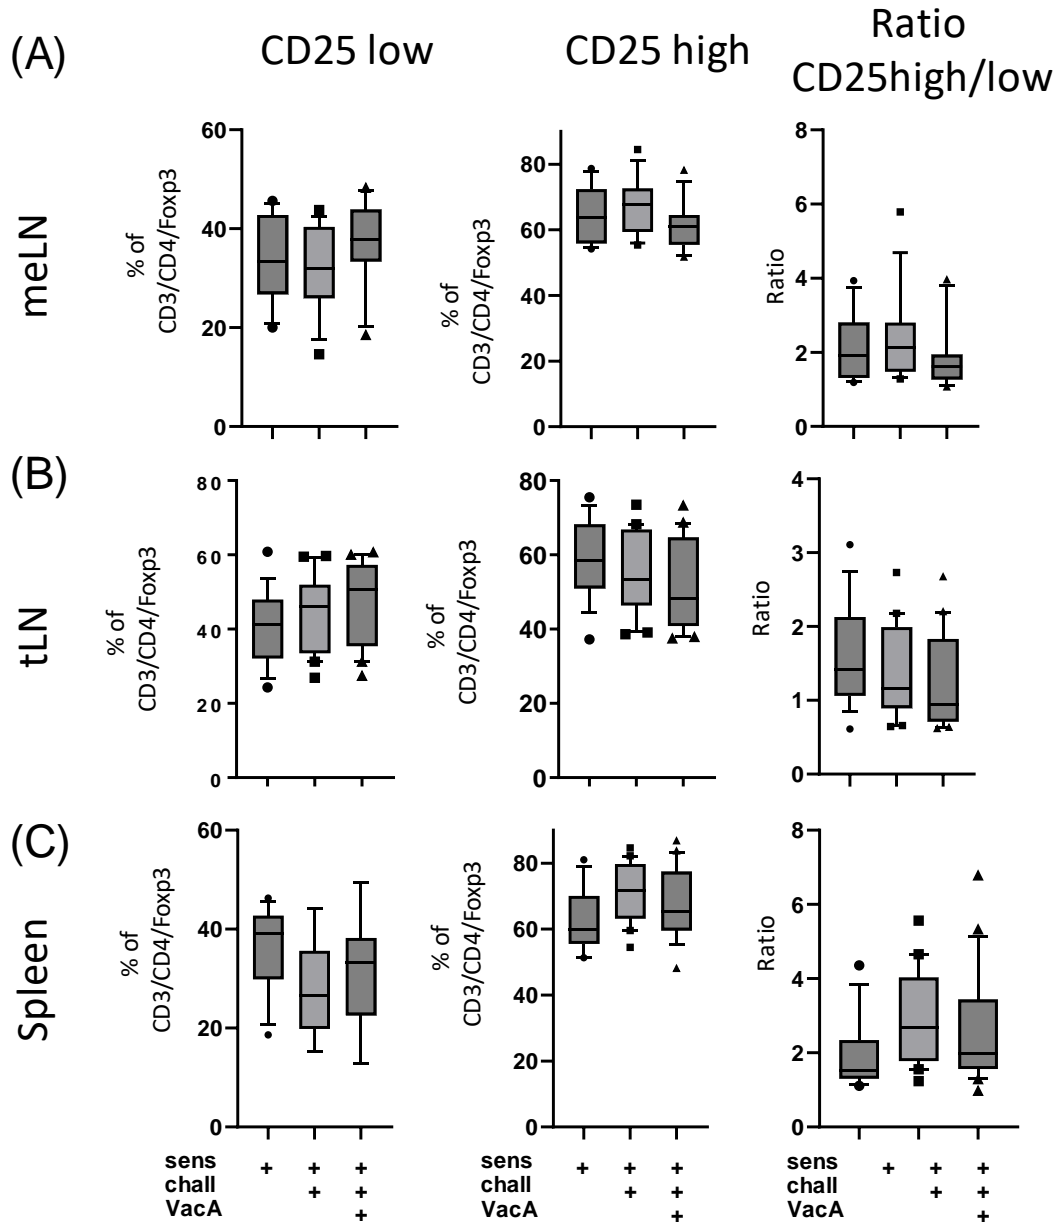

**Supplementary Figure 4: Treatment with VacA did not affect Treg Subtypes** Within the population of CD3<sup>+</sup>CD4<sup>+</sup>/FoxP3<sup>+</sup> cells CD25<sup>low</sup> and CD25<sup>high</sup> cells were analyzed. Boxplots (Whiskers 10-90 percentile) show percentage of CD25<sup>low</sup>, CD25<sup>high</sup> and Ratio of CD25<sup>high</sup>/CD25<sup>low</sup> Tregs in A) meLN B) tLN and C) spleen of HDM/PBS, HDM/HDM and HDM/HDM VacA-treated mice. Results are from 4-5 independent experiments, n=13-21 mice per group.

Analysis of variance, \*p<0.05, \*\*p<0.01, \*\*\*p<0.001.



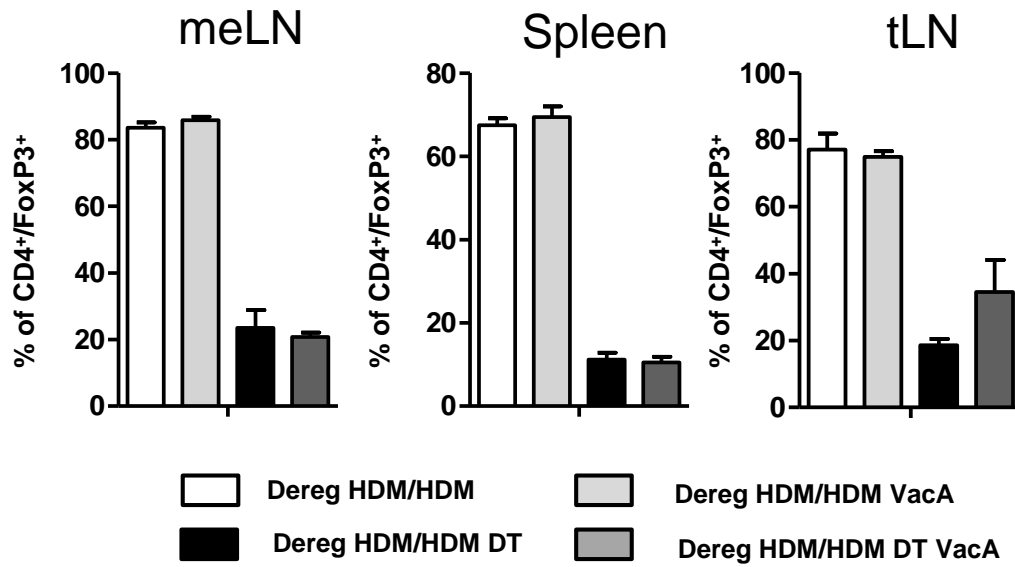

**Supplementary Figure 5:**

Bar graphs show the proportion (%) of green fluorescent protein (GFP)-positive regulatory T cells in DEREK mice sens/chall (white bars), DEREK mice sens/chall treated with VacA (light gray bars), DEREK mice sens/chall with DT depletion (black bars) and DEREK mice sens/chall treated with VacA and DT depletion (dark gray bars).

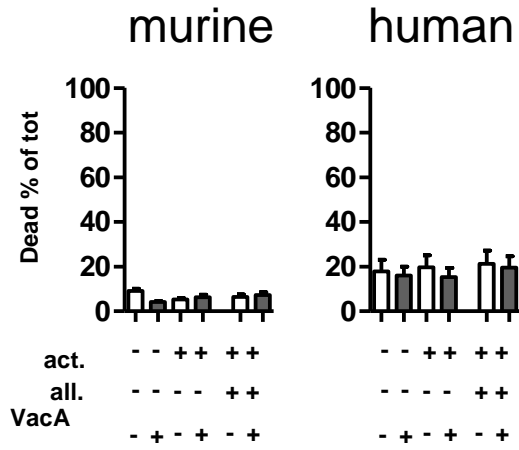

**Supplementary Figure 6: VacA did not demonstrate cytotoxic effects.** Bar graphs demonstrate % of dead cells in the in vitro cultures of murine and human naïve, activated and activated VacA supplemented dendritic cells.
